# Supplementary material for: Combined use of EpCAM and FRα enables the high-efficiency capture of circulating tumor cells in non-small cell lung cancer
Source: PubMed Central journal article supplement (PMC5775318; doi:10.1038/s41598-018-19391-1), 2018-01-19
Supplement: 41598_2018_19391_MOESM1_ESM.pdf [file 41598_2018_19391_MOESM1_ESM.pdf]

**Combined use of EpCAM and FR $\alpha$  enables the high-efficiency capture of circulating tumor cells in non-small cell lung cancer**

Luojun Chen<sup>1, +</sup>, Min Peng<sup>1, +</sup>, Na Li<sup>1, \*</sup>, Qibin Song<sup>1, \*</sup>, Yi Yao<sup>1</sup>, Bin Xu<sup>1</sup>, Huali Liu<sup>1</sup>, Peng Ruan<sup>1</sup>

<sup>1</sup> Department of Oncology, Renmin Hospital of Wuhan University, Wuhan, 430060, China.

\*corresponding: qibinsong@163.com; nalirenmin@163.com.

<sup>+</sup>these authors contributed equally to this work

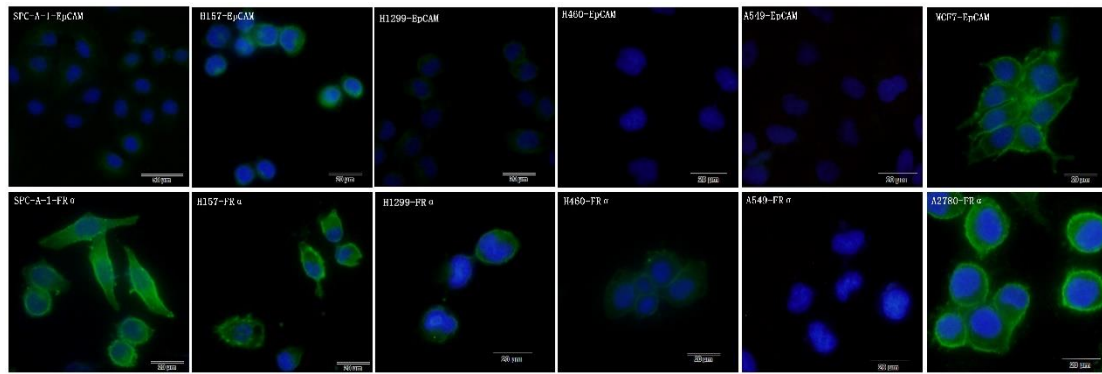

Fig.S1 Immunofluorescent detection of EpCAM and FR $\alpha$  expression in 5 types of NSCLC cells.

EpCAM and FR $\alpha$  stained with Alexa Fluor<sup>®</sup> 488 are green at an excitation of 488 nm, and the nuclei stained with DAPI are blue at an excitation of 405 nm. As a positive control, we used EpCAM-stained MCF7 cells, which are highly expressed EpCAM, and FR $\alpha$ -stained A2780 cells, which are highly expressed FR $\alpha$ .

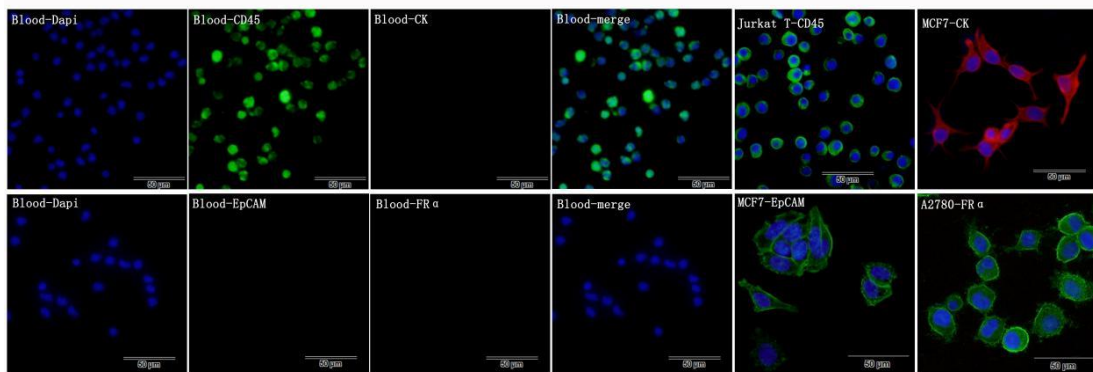

Fig. S2 Immunofluorescent detection of the expressions of CK19, CD45, EpCAM, and FR $\alpha$  in peripheral blood mononuclear cells: CD45s stained with Alexa Fluor<sup>®</sup> 488 are green at an excitation of 488 nm; CK19s stained with Alexa Fluor<sup>®</sup> 568 are red at an excitation of 568 nm; EpCAM and FR $\alpha$  stained with Alexa Fluor<sup>®</sup> 488 are green at an excitation of 488 nm; and the nuclei stained with DAPI are blue at an excitation of 405 nm. As a positive control, we used CD45-stained Jurkat cells, which highly express CD45, CK19-stained MCF7 cells, which highly express CK19, EpCAM-

stained MCF7 cells, which highly express EpCAM, and FR $\alpha$ -stained A2780 cells, which highly express FR $\alpha$ .

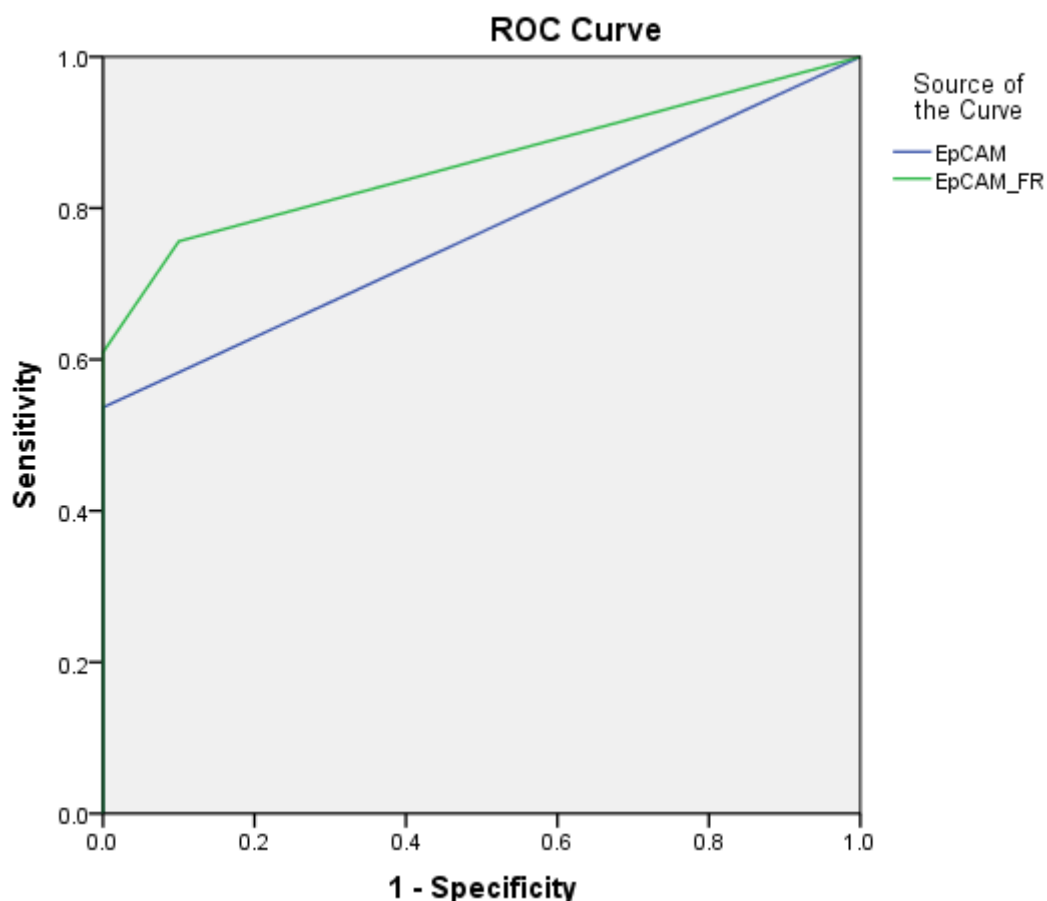

Fig. S3 ROC plots of using anti-EpCAM-MNs plus anti-FR $\alpha$ -MNs & anti-EpCAM-MNs to detect CTCs from 41 NSCLC patients and 10 healthy donors. The area under the receiver operating characteristic curve (AUC-ROC) analysis showed that the combination of anti-EpCAM-MNs and anti-FR $\alpha$ -MNs had a higher AUC (0.8585, 95% CI: 0.7579-0.9592,  $p=0.0005$ ) than that of anti-EpCAM-MNs alone (0.7683, 95% CI: 0.6384-0.8982,  $p=0.0091$ ).
